# Supplementary material for: A dual pH/thermal responsive nanocarrier for combined chemo-thermotherapy based on a copper–doxorubicin complex and gold nanorods
Source: Royal Society of Chemistry journal article supplement (doi:10.1039/c5nr04353k), 2015-01-01
Supplement: c5nr04353k1.pdf [file c5nr04353k1.pdf]

## Supplementary Information

### In vivo biodistribution and imaging

For in vivo biodistribution studies, both of ASDox-TSLs and CuDox-TSLs accumulated within the tumors at 4 hours after intravenous injection (Fig. S1.). As a result, we intratumorally injected AuNRs at 4 hours after TSLs injection to make sure they were accumulated in tumor tissue at the same time.

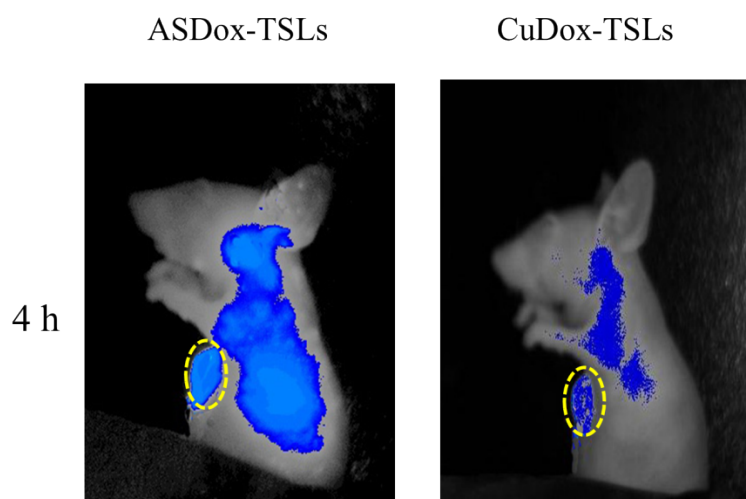

Fig. S1. In vivo Biodistribution of of Dox in MCF-7-bearing mice, 4 h after the injection of ASDox-TSLs or CuDox-TSLs.
